# Supplementary material for: Zn2+ Aggravates Tau Aggregation and Neurotoxicity
Source: PubMed Central journal article supplement (PMC6387307; doi:10.3390/ijms20030487), 2019-01-23
Supplement: ijms-20-00487-s001.pdf [file ijms-20-00487-s001.pdf]

*Supporting Information*

**Zn<sup>2+</sup> Aggravates Tau Aggregation and Neurotoxicity**

by Xuexia Li, Xiubo Du, and Jiazuan Ni

**Isothermal titration calorimetry (ITC).**

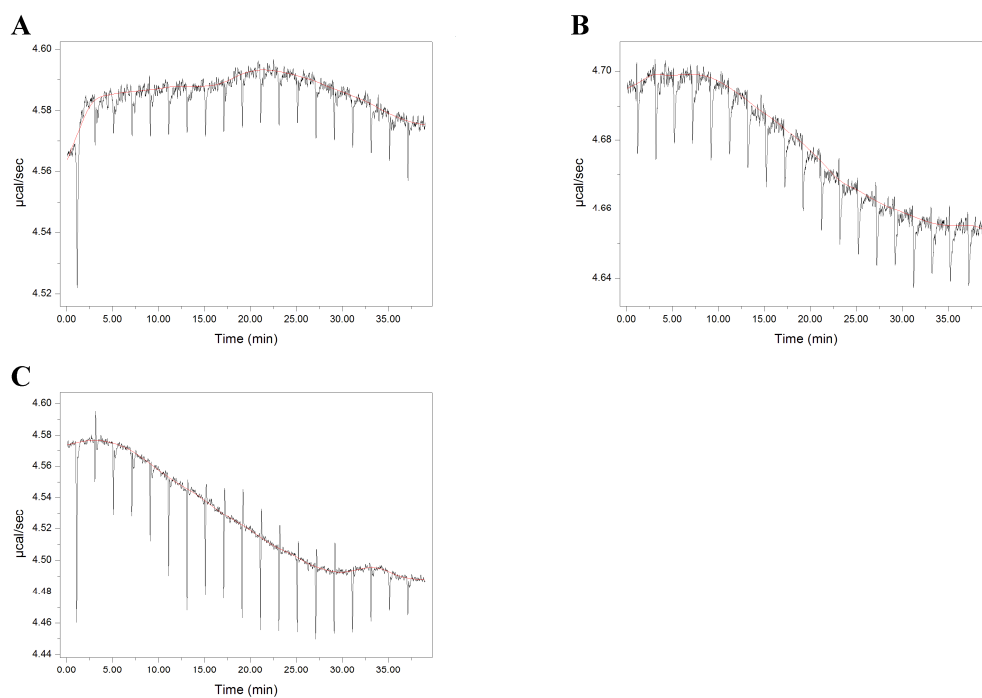

**Figure S1.** Properties of cations binding to tau-R3. (A) (B) and (C) ITC profiles for the binding of Mn<sup>2+</sup>, Mo<sup>5+</sup> or Fe<sup>3+</sup> to Tau-R3, respectively.
